# Supplementary material for: Follicular Dendritic Cell-Specific Prion Protein (PrPc) Expression Alone Is Sufficient to Sustain Prion Infection in the Spleen
Source: PubMed Central journal article supplement (PMC3228802; doi:10.1371/journal.ppat.1002402), 2011-12-01

# Follicular Dendritic Cell-Specific Prion Protein (PrP<sup>C</sup>) Expression Alone is Sufficient to Sustain Prion Infection in the Spleen

Running head: Role of Follicular Dendritic Cells in Prion Pathogenesis

Laura McCulloch, Karen L. Brown, Barry Bradford, John Hopkins, Mick Bailey, Klaus Rajewsky, Jean C. Manson & Neil A. Mabbott

**Figure S1. In the absence of PrP<sup>C</sup> expression by follicular dendritic cells prions are scavenged by tingible body macrophages in the spleen**

Mice were injected i.p. with ME7 scrapie prions. Spleens from CD21-Cre *Prnp*<sup>stop/-</sup> → *Prnp*<sup>stop/-</sup> mice (in which cellular PrP<sup>C</sup> was expressed only on B cells, upper row), *Prnp*<sup>flox/-</sup> → CD21-Cre *Prnp*<sup>flox/-</sup> mice (with FDC-restricted PrP<sup>C</sup> ablation, middle row) and CD21-Cre *Prnp*<sup>flox/-</sup> → CD21-Cre *Prnp*<sup>flox/-</sup> mice (in which PrP<sup>C</sup> expression was ablated on FDC and B cells, lower row) were collected 70 days after i.p. infection. Due to the absence of PrP<sup>C</sup>-expressing FDC prion replication in these tissues was blocked. However, in the spleens of some of these mice, low levels of PrP<sup>d</sup> (left-hand column, red) were occasionally localised within cells with characteristics typical of tingible body macrophages. These cells contained the remnants of many phagocytosed apoptotic lymphocytes (*tingible bodies*, arrowheads) and expressed the tissue macrophage marker EGF-like module-containing mucin-like hormone receptor-like 1 (EMR1) detected by mAb F4/80 (right-hand column, brown). Data are representative of spleens from at least 4 mice from each group. Sections are counterstained with haematoxylin (blue). Scale bar, 20 μm.

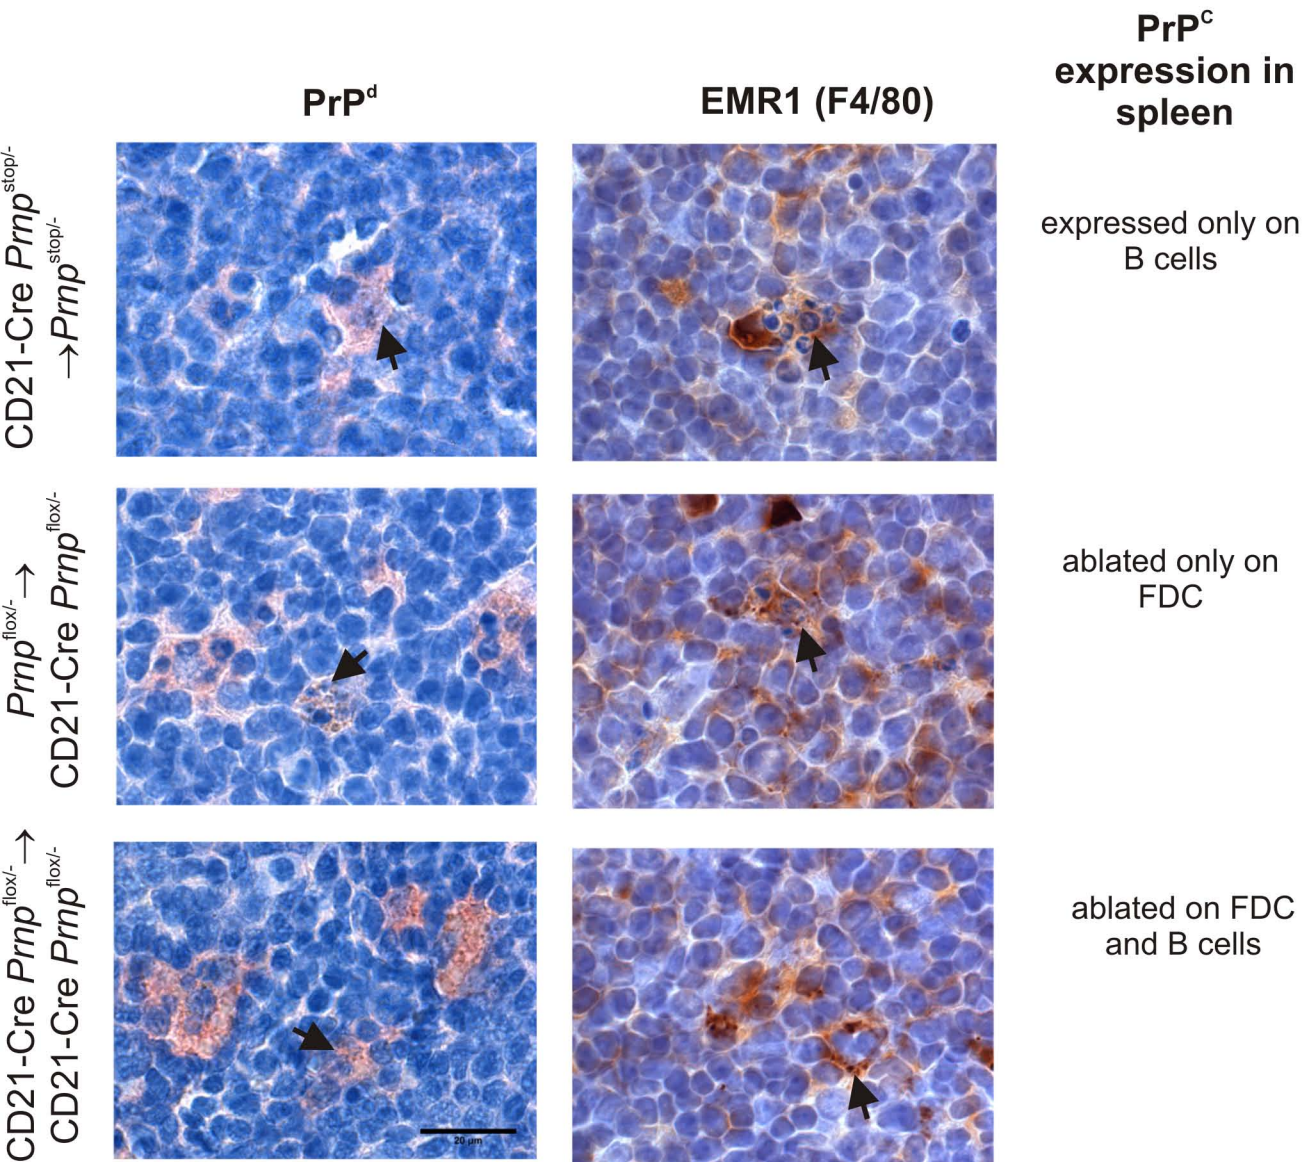

Supplement: ppat.1002402.s001.pdf [file ppat.1002402.s001.pdf]
