# Supplementary material for: Follicular Dendritic Cell-Specific Prion Protein (PrPc) Expression Alone Is Sufficient to Sustain Prion Infection in the Spleen
Source: PubMed Central journal article supplement (PMC3228802; doi:10.1371/journal.ppat.1002402), 2011-12-01

# Follicular Dendritic Cell-Specific Prion Protein (PrP<sup>C</sup>) Expression Alone is Sufficient to Sustain Prion Infection in the Spleen

Running head: Role of Follicular Dendritic Cells in Prion Pathogenesis

**Laura McCulloch, Karen L. Brown, Barry Bradford, John Hopkins, Mick Bailey, Klaus Rajewsky, Jean C. Manson & Neil A. Mabbott**

## **Figure S2. Follicular dendritic cell-specific PrP<sup>C</sup> expression alone is sufficient to sustain high levels of prion infectivity in the spleen**

Prion infectivity levels were assayed spleens from control mice ( $Prnp^{+/-} \rightarrow Prnp^{flox/-}$  mice),  $Prnp^{stop/-} \rightarrow CD21-Cre Prnp^{stop/-}$  mice in which cellular PrP<sup>C</sup> was expressed only on FDC and  $Prnp^{flox/-} \rightarrow CD21-Cre Prnp^{flox/-}$  mice with FDC-restricted PrP<sup>C</sup> ablation ( $n = 3/\text{group}$ ) collected 70 days after i.p. with ME7 scrapie prions. Prion infectivity titres were determined by transmission of tissue homogenates into groups of 4 indicator tga20 mice. Each point represents data derived from an individual spleen. Data below the horizontal line indicate disease incidence in the recipient mice <100% and considered to contain trace levels of prion infectivity. High levels of prion infectivity were detected in spleens of control mice and those in which cellular PrP<sup>C</sup> was expressed only on FDC (left-hand and middle panels, respectively). However, this accumulation was blocked in spleens with FDC-restricted PrP<sup>C</sup> ablation as only trace levels of infectivity were detected (right-hand panel).

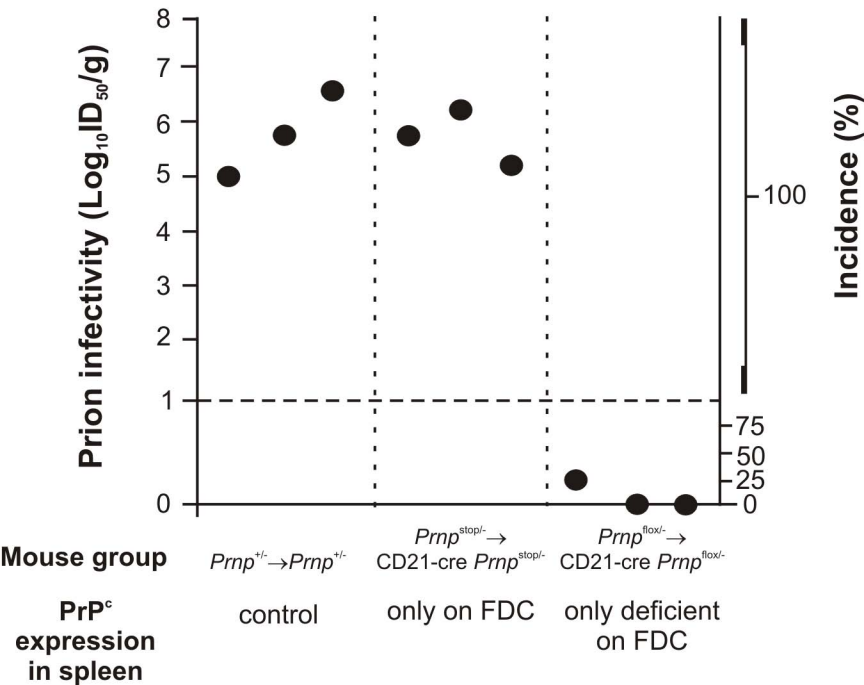

Supplement: ppat.1002402.s002.pdf [file ppat.1002402.s002.pdf]
