# Supplementary material for: Follicular Dendritic Cell-Specific Prion Protein (PrPc) Expression Alone Is Sufficient to Sustain Prion Infection in the Spleen
Source: PubMed Central journal article supplement (PMC3228802; doi:10.1371/journal.ppat.1002402), 2011-12-01
Supplement: ppat.1002402.s003.pdf [file ppat.1002402.s003.pdf]

# Follicular Dendritic Cell-Specific Prion Protein (Prp<sup>C</sup>) Expression Alone is Sufficient to Sustain Prion Infection in the Spleen

Running head: Role of Follicular Dendritic Cells in Prion Pathogenesis

**Laura McCulloch, Karen L. Brown, Barry Bradford, John Hopkins, Mick Bailey, Klaus Rajewsky, Jean C. Manson & Neil A. Mabbott**

**Figure S3. Effect of FDC-restricted PrP<sup>C</sup>-ablation on disease pathogenesis within the brain after i.p. prion exposure.**

Mice were injected i.p. with ME7 scrapie prions. Brains were collected from clinically scrapie-affected mice and mice which were free of the clinical signs of prion disease at the time of cull and the neuropathology within each brain compared. High levels of spongiform pathology (H&E, upper row), heavy accumulations of PrP<sup>d</sup> (brown, second row), reactive astrocytes expressing GFAP (brown, third row) and active microglia expressing Iba-1 (brown, bottom row) were detected in the hippocampi of the brains of all clinically scrapie-affected control mice (right-hand column,  $n = 5$ ) and mice in which PrP<sup>C</sup> expression was ablated in B cells only (CD21-Cre  $Prnp^{flox/-} \rightarrow Prnp^{flox/-}$  mice, third column,  $n = 3$ ). In contrast, none of the mice with PrP<sup>C</sup>-ablated FDC (FDC-restricted,  $Prnp^{flox/-} \rightarrow CD21-Cre Prnp^{flox/-}$  mice, first column,  $n = 6$ ; FDC and B cells, CD21-Cre  $Prnp^{flox/-} \rightarrow CD21-Cre Prnp^{flox/-}$  mice, second column,  $n = 7$ ) developed clinical signs of prion disease during their life-spans or histopathological signs of prion disease in their brains. Scale bar, = 500  $\mu$ m. Clin., presence of clinical signs of scrapie at the time of cull; Path., histopathological detection of spongiform pathology in the brain; dpi, days post i.p. prion infection.

$Prnp^{flox/-} \rightarrow$   
CD21-cre  $Prnp^{flox/-}$

CD21-cre  $Prnp^{flox/-} \rightarrow$   
CD21-cre  $Prnp^{flox/-}$

CD21-cre  $Prnp^{flox/-} \rightarrow$   
 $Prnp^{flox/-}$

$Prnp^{+/-} \rightarrow Prnp^{+/-}$

H&amp;E

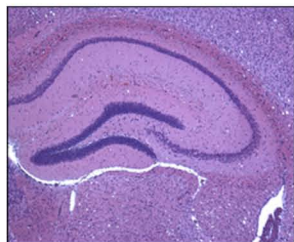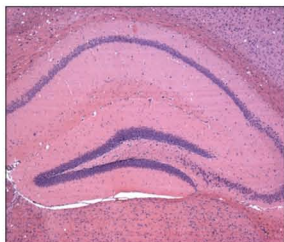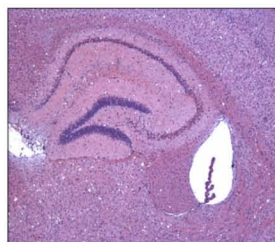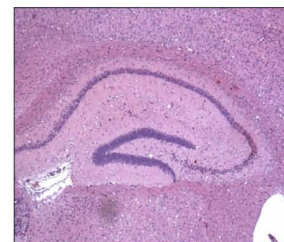PrP<sup>d</sup>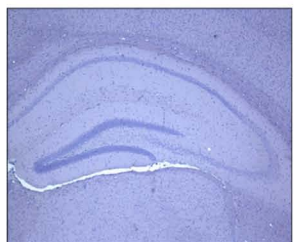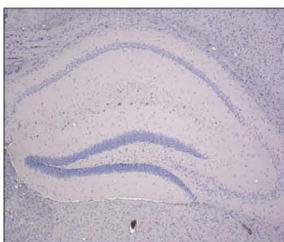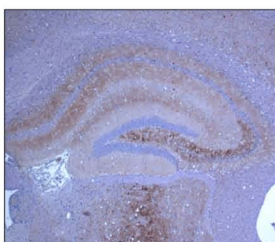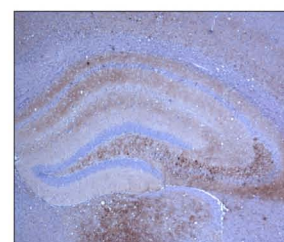

GFAP

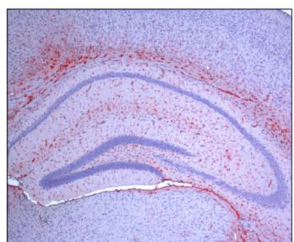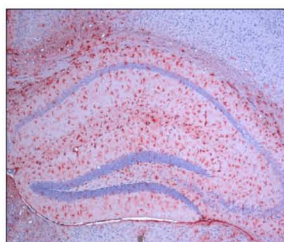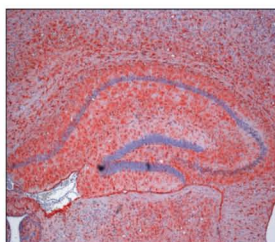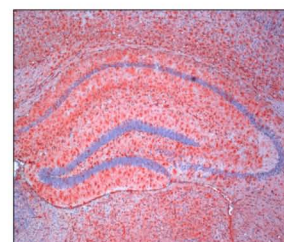

Iba-1

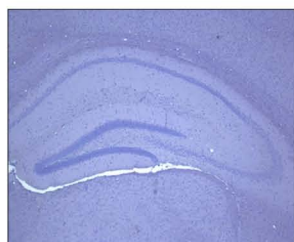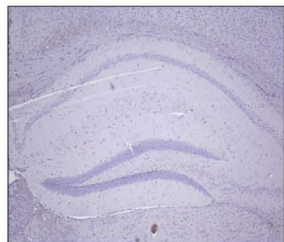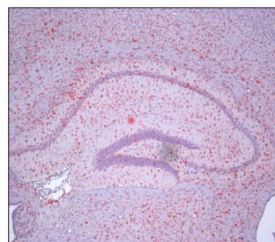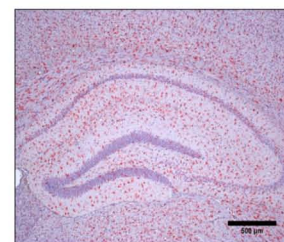

Clin. negative

negative

positive

positive

Path. negative

negative

positive

positive

d.p.i. 363

370

398

356
